# Supplementary material for: Splice-switching of the oncogenic BCS1L isoform suppresses ovarian cancer progression by disrupting mitochondrial function
Source: Cell Death Dis. 2026 Mar 3;17(1):293. doi: 10.1038/s41419-026-08495-6 (PMC13039997; doi:10.1038/s41419-026-08495-6)
Supplement: Supplementary file 2 — Supplementary Tables [file 41419_2026_8495_MOESM2_ESM.xlsx]

## Sheet: Sheet1
Supplemental Table 1. Description of antibodies
	Antibody	Supplier	Catalog number
	BCS1L Rabbit pAb	Abclonal	A7647
	COX IV Mouse mAb	Cell Signaling Technology	#11967
	alpha-Tubulin Mouse mAb	Proteintech	66031-1-Ig
	Flag-M2 Mouse mAb	Sigma-Aldrich	F1804
	HuR Mouse mAb	Thermo Scientific	1862775
	USP39 Rabbit mAb	Abcam	ab131244
	mCherry Rabbit pAb	Proteintech	26765-1-AP
	TOM20 Rabbit pAb	Proteintech	11802-1-AP
	Beta Actin Mouse mAb	Proteintech	66009-1-Ig
	GAPDH Rabbit mAb	Zen bioscience	R380626

## Sheet: Sheet2
Supplemental Table 2. Primers information
	Name	Forward primer 5'-3'	Reverse primer 5'-3'
Semiquantitativ RT-PCR	SEMI-BCS1L-S	AGAGTCACGGCGGTATCGGGGGAAAT	GGATGTTGAAGAAAACCTTTCG
	SEMI-BCS1L-L	GCGCCATTACATGATCACAC	CTTCGTTCTACCCGAATCCA
	SEMI-ACTIN	CTCTTCCAGCCTTCCTTCCT	AGCACTGTGTTGGCGTACAG
Minigene	SEMI-MINI-1-2a2b	AGAGTCACGGCGGTATCGGGGGAAAT	GGTGACAGATTCCCAAGGAG
	SEMI-MINI-1-3	GCGCCATTACATGATCACAC	CTTCGTTCTACCCGAATCCA
	SEMI-USP39	CACTTACCTGCCGGGTATTGT	CCTGGAGGACGTTTGATGTTCT
RIP	RIP-BCS1L	GCGCCATTACATGATCACAC	GTCTCGACACTGAGGTGCTG
	RIP-U6snRNA	CTCGCTTCGGCAGCACA	AACGCTTCACGAATTTGCGT
RNA-pull down	Rpd-T7-BCS1L	TAATACGACTCACTATAGGGGGTTTGGTGTTTCCCTTTCA	AGTCCCCGTCTGCAAGTCTA
Qpcr	QPCR-BCS1L-L	TTTGGTGTTTCCCTTTCAAGAT	GATTGTCCTTCAGAGCCAGAAT
	QPCR-BCS1L-S	AGAGTCACGGCGGTATCGGGGGAAAT	GGATGTTGAAGAAAACCTTTCG
	QPCR-ACTIN	CTCTTCCAGCCTTCCTTCCT	AGCACTGTGTTGGCGTACAG
	QPCR-YBX1	GGGTGCAGGAGAACAAGGTA	TCTTCATTGCCGTCCTCTCT
	QPCR-HSPA8	GGAGGTGGCACTTTTGATGT	AGCAGTACGGAGGCGTCTTA
	QPCR-HNRNPF	ACTGCCAGGAGGTACATTGG	CTGAGGTCTCTCCCGAACAG
	QPCR-SF3B4	GCCTTTGGGGTCATCTTACA	CGAAGCATCAAATGAAGCAA
	QPCR-SNRPC	CCTCACCCATGACTCTCCAT	CTCTGAGCCTGCTCTTCCAT
	QPCR-SNRNP40	CCAAGATGTTCCTCCCTTCA	ATGCTAAGGTGGATCCGTTG
	QPCR-USP39	CACTTACCTGCCGGGTATTGT	CCTGGAGGACGTTTGATGTTCT
	QPCR-PUF60	ATGGGCTTTGGAGATCCTCT	GGGACCTCATACTCCACGAA

## Sheet: Sheet3
Supplemental Table 3. Sequence of siRNA and ASO
	name	sequence(5 ′—3 ′)
	negative control	TTCTCCGAACGTGTCACGT
	si-USP39-1	TCAAGAGATTCACTAAGAA
	si-USP39-2	GCAGTTGTACTTTGCAGTA
	si-USP39-3	CCAGACAACUAUGAGAUCAUCGAUU
	si-BCS1L-1	GACAGGAGCUAUGCCUGGUUGCUUA
	si-BCS1L-2	GACCACUGAAUUCUGUGGUUCUACA
	si-BCS1L-3	CACUGAAUUCUGUGGUUCUACAACA
	si-YBX1	CACAGTATTCCAACCCTCCTGTGCA
	si-HSPA8	GAGCAGAAAGAAACGUGCUCAUCUU
	si-HNRNPF	GAAAUUGUGCCAAACGGGAUCACAU
	si-SF3B4	GGCUAUGGCUUUGUGGAAUUCUUGA
	si-SNRPC	GCAGUGGAAGGAAACACAAAGAGAA
	si-SNRNP40	UCUGCAGGAUUUGACCGACUGAUAU
	si-PUF60	AGAGCAUCAAGAGUGUGCUGGUGAA
	ASO-control	C*C*T*C*T*T*A*C*C*TCAGTTA*C*A*A*T*T*T*A*T*A
	ASO-BCS1L-1	C*T*C*G*A*C*A*C*TGAGGT*G*C*T*G*A*G*T*A*C
	ASO-BCS1L-2	C*C*A*C*C*T*T*ACCAGA*T*A*A*A*A*T*G*G
	ASO-BCS1L-3	C*T*C*C*C*T*A*G*C*TCCCC*A*C*C*T*T*A*C
		"*" means phosphorothioate-modified

## Sheet: Sheet4
Supplemental Table 4. Mitochondrial complex main subunit
	Complex	Subunit
	I	NDUFS1
		NDUFV1
		NDUFS2
		NDUFA13
	II	SDHA
		SDHB
		SDHC
		SDHD
	III	UQCRC1
		UQCRC2
		CYC1
		BCS1L
	IV	MT-CO1
		MT-CO2
		MT-CO3
		COX4I1
		COX6A1
	V	ATP5F1
		ATP5O
